# Supplementary material
Source: PubMed Central journal article supplement (PMC4694560)
Supplement: NIHMS150180-supplement-supp_fig_1.pdf [file NIHMS150180-supplement-supp_fig_1.pdf]

# PROTEOMICS

**Supporting Information  
for Proteomics Clin. Appl.  
DOI 10.1002/prca.200800252**

Christopher F. Hoehamer, Edwin D. Cummings, George M. Hilliard,  
Joachim Morschhäuser and P. David Rogers

**Proteomic analysis of Mrr1p- and Tac1p-associated differential protein  
expression in azole-resistant clinical isolates of *Candida albicans***

**Table S1.** Description of the differentially expressed proteins identified in clinical isolate F5 and mutant strain SCzcf36MK3A by PMF and MALDI-TOF MS

| Protein   | Systematic Name | Function                                       | Mr<br>pl | Z<br>(kDa) | Protein<br>score | Matched<br>coverage | Matched<br>peptides | Fold changes |                |                      | Student's <i>t</i> -test |           |             |
|-----------|-----------------|------------------------------------------------|----------|------------|------------------|---------------------|---------------------|--------------|----------------|----------------------|--------------------------|-----------|-------------|
|           |                 |                                                |          |            |                  |                     |                     | (F5/F1)      | (F5MRR1M4B/F1) | (SCzcf36MK3A/SC5314) | F5/F1                    | F5MRR1M4B | SCzcf36MK3A |
| Eno1p     | orf19.395       | Enolase (2-Phosphoglycerate dehydratase)       | 5.5      | 47.2       | 2.4              | 21                  | 7                   | 2.1 ± 0.5    | 2.7 ± 0.9      | 0.8 ± 0.8            | 0.04                     | 0.03      | 0.21        |
| Tdh3p     | orf19.6814      | Glyceraldehyde-3-phosphate dehydrogenase       | 6.6      | 35.8       | 2.4              | 45                  | 9                   | 2.0 ± 1.9    | 1.4 ± 0.1      | 1.0 ± 0.4            | 0.21                     | 0.32      | 0.40        |
| Gpx1p     | orf19.86        | Glutathione peroxidase                         | 6.6      | 18.1       | 2.4              | 35                  | 7                   | 3.7 ± 1.0    | 0.8 ± 0.4      | 34.2 ± 8.5           | 0.00                     | 0.22      | 0.05        |
| Grp2p     | orf19.4309      | Reductase                                      | 6        | 37.6       | 2.4              | 31                  | 9                   | 4.1 ± 0.9    | 1.0 ± 0.2      | 10.0 ± 7.0           | 0.00                     | 0.36      | 0.15        |
| Grp2p     | orf19.4309      | Reductase                                      | 6        | 37.6       | 2.3              | 28                  | 8                   | 5.5 ± 2.3    | 1.2 ± 0.6      | 4.7 ± 0.3            | 0.07                     | 0.26      | 0.07        |
| lfd1p     | orf19.1048      | Putative aryl-alcohol dehydrogenase            | 5.6      | 39.1       | 2.4              | 42                  | 15                  | 10 ± 6.2     | 1.1 ± 0.6      | 11.6 ± 3.8           | 0.11                     | 0.37      | 0.00        |
| lfd4p     | orf19.4477      | Putative aryl-alcohol dehydrogenase            | 6        | 38.3       | 2.4              | 37                  | 15                  | 10.1 ± 4.7   | 1.1 ± 0.1      | 35.2 ± 11.8          | 0.08                     | 0.10      | 0.02        |
| lfd5p     | orf19.1048      | Putative aryl-alcohol dehydrogenase            | 5.4      | 39.2       | 2.2              | 31                  | 9                   | 4.4 ± 1.9    | 1.3 ± 0.4      | 4.2 ± 1.6            | 0.11                     | 0.28      | 0.01        |
| lfd6p     | orf19.4476      | Putative aryl-alcohol dehydrogenase            | 5.9      | 39.1       | 2.2              | 26                  | 8                   | 5.1 ± 4.9    | 1.1 ± 0.1      | 190.1 ± 274          | 0.15                     | 0.10      | 0.07        |
| lpf5987p  | orf19.7306      | Aldo-keto reductase                            | 5.5      | 39.0       | 2.3              | 43                  | 9                   | 4.7 ± 0.8    | 0.9 ± 0.1      | 102.6 ± 80           | 0.02                     | 0.07      | 0.04        |
| Oye32p    | orf19.3131      | Putative NADPH-dependent flavin oxidoreductase | 5.9      | 47.5       | 2.4              | 30                  | 10                  | 7.3 ± 2.5    | 1.1 ± 0.1      | No spot              | 0.00                     | 0.40      | N/A         |
| Adh4p     | orf19.271       | 2,4-dienoyl-coenzyme A reductase               | 7        | 28.1       | 2.4              | 28                  | 8                   | 25.2 ± 5.3   | 1.0 ± 0.2      | 2.7 ± 0.6            | 0.02                     | 0.36      | 0.00        |
| lpf17186p | orf19.251       | Heat shock protein 31 of DJ-1/Pfpl family      | 4.7      | 25.8       | 2.3              | 20                  | 5                   | 6.1 ± 0.6    | 1.3 ± 0.2      | 3.5 ± 1.3            | 0.00                     | 0.04      | 0.06        |
| lpf17186p | orf19.251       | Heat shock protein 31 of DJ-1/Pfpl family      | 4.7      | 25.8       | 2.1              | 25                  | 9                   | 7.9 ± 0.2    | 1.4 ± 0.1      | 2.6 ± 1.1            | 0.04                     | 0.02      | 0.08        |
| Gnd1p     | orf19.5024      | 6-Phosphogluconate dehydrogenase               | 6.1      | 56.9       | 2.4              | 18                  | 8                   | 0.4 ± 0.1    | 1.3 ± 0.2      | 1.3 ± 0.8            | 0.00                     | 0.07      | 0.34        |
| Hxk2p     | orf19.542       | Hexokinase II, 3-prime end                     | 5.1      | 47.5       | 2.3              | 26                  | 11                  | 2 ± 0.7      | 1.6 ± 1.1      | 0.9 ± 1.4            | 0.06                     | 0.30      | 0.36        |
| Tkl1p     | orf19.5112      | Transketolase 1                                | 5.5      | 73.8       | 1.7              | 13                  | 6                   | 1.8 ± 0.7    | 1.3 ± 0.5      | 1.2 ± 1.4            | 0.01                     | 0.33      | 0.44        |
| Sam2p     | orf19.657       | S-Adenosylmethionine synthetase                | 5.6      | 42.2       | 1.7              | 23                  | 8                   | 1.5 ± 0.4    | 1.3 ± 0.4      | 1.0 ± 0.4            | 0.08                     | 0.09      | 0.38        |
| Aco1p     | orf19.6385      | Aconitate hydratase                            | 6        | 84.2       | 1.6              | 10                  | 7                   | 0.5 ± 0.1    | 0.9 ± 0.3      | 1.1 ± 0.7            | 0.04                     | 0.10      | 0.21        |
| Ura5p     | orf19.2555      | Orotate phosphoribosyltransferase              | 5.9      | 23.5       | 1.8              | 25                  | 5                   | 0.6 ± 0.3    | 0.7 ± 0.3      | 1.1 ± 0.8            | 0.063                    | 0.08      | 0.47        |
| Pgk1p     | orf19.3651      | Phosphoglycerate kinase                        | 6.1      | 45.2       | 2.4              | 34                  | 12                  | 1.6 ± 1.1    | 1.5 ± 0.5      | 1.3 ± 0.4            | 0.09                     | 0.13      | 0.13        |

N/A-not applicable

**Table S2.** Description of the differentially expressed proteins identified in clinical isolate G5 by PMF and MALDI-TOF MS

| Protein   | Systematic <sup>a</sup><br>Name | Function                                       | pI  | Mr<br>(kDa) | Z<br>score | Protein<br>coverage | Matched<br>peptides | Fold<br>change<br>(G5/G1) | Student's<br>t-test |
|-----------|---------------------------------|------------------------------------------------|-----|-------------|------------|---------------------|---------------------|---------------------------|---------------------|
| Adh1p     | orf19.3997                      | Alcohol dehydrogenase                          | 8.6 | 46.1        | 2.4        | 36                  | 15                  | 1.7 ± 0.7                 | 0.19                |
| Cyp1p     | orf19.6472                      | Cyclophilin (peptidylprolyl isomerase)         | 7.9 | 17.7        | 2.4        | 40                  | 7                   | 0.6 ± 0.1                 | 0.00                |
| Eno1p     | orf19.395                       | Enolase (2-Phosphoglycerate dehydratase)       | 5.5 | 47.2        | 2.4        | 61                  | 20                  | 2.2 ± 0.7                 | 0.04                |
| Fba1p     | orf19.4618                      | Fructose-bisphosphate aldolase                 | 5.7 | 39.2        | 2.4        | 24                  | 9                   | 2.4 ± 0.6                 | 0.02                |
| Tdh3p     | orf19.6814                      | Glyceraldehyde-3-phosphate dehydrogenase       | 6.6 | 35.8        | 2.4        | 25                  | 9                   | 1.9 ± 0.3                 | 0.05                |
| Gpx1p     | orf19.86                        | Glutathion peroxidase                          | 6.6 | 18.1        | 2.4        | 41                  | 8                   | 3.8 ± 0.3                 | 0.04                |
| Grp2p     | orf19.4309                      | Reductase                                      | 6   | 37.6        | 2.4        | 22                  | 9                   | 4.4 ± 1.1                 | 0.05                |
| Grp2p     | orf19.4309                      | Reductase                                      | 6   | 37.6        | 2.4        | 35                  | 13                  | 5.3 ± 0.9                 | 0.02                |
| lfd1p     | orf19.1048                      | Putative aryl-alcohol dehydrogenase            | 5.6 | 39.1        | 1.8        | 28                  | 8                   | 3.9 ± 0.4                 | 0.00                |
| lfd4p     | orf19.4477                      | Putative aryl-alcohol dehydrogenase            | 6   | 38.3        | 2.4        | 46                  | 19                  | 27.6 ± 16.2               | 0.19                |
| lfd5p     | orf19.1048                      | Putative aryl-alcohol dehydrogenase            | 5.4 | 39.2        | 2.4        | 33                  | 12                  | 13.9 ± 6.2                | 0.20                |
| lfd6p     | orf19.4476                      | Putative aryl-alcohol dehydrogenase            | 5.9 | 39.1        | 1.2        | 49                  | 10                  | 201 ± 46                  | 0.00                |
| lpf351p   | orf19.7531                      | Unknown function                               | 7.9 | 25.2        | 1.9        | 18                  | 5                   | 0.5 ± 0                   | 0.00                |
| lpf1621p  | orf19.6585                      | Unknown function                               | 9.6 | 14.4        | 2.2        | 44                  | 5                   | 0.5 ± 0                   | 0.00                |
| lpf5987p  | orf19.7306                      | Aldo-keto reductase                            | 5.5 | 39.0        | 1.8        | 21                  | 6                   | 5.4 ± 3.2                 | 0.04                |
| Oye32p    | orf19.3131                      | Putative NADPH-dependent flavin oxidoreductase | 5.9 | 47.5        | 1.8        | 21                  | 6                   | 4.8 ± 0.4                 | 0.00                |
| Adh4p     | orf19.271                       | 2,4-dienoyl-coenzyme A reductase               | 7   | 28.1        | 2.4        | 22                  | 6                   | 4.5 ± 0.5                 | 0.00                |
| lpf17186p | orf19.251                       | Heat shock protein 31 of DJ-1/Pfp1 family      | 4.7 | 25.8        | 2.3        | 35                  | 7                   | 10.8 ± 2.2                | 0.00                |
| lpf17186p | orf19.251                       | Heat shock protein 31 of DJ-1/Pfp1 family      | 4.7 | 25.8        | 2.4        | 23                  | 7                   | 2 ± 0.6                   | 0.08                |
| Pdc11p    | orf19.2877                      | Pyruvate decarboxylase                         | 5.4 | 62.4        | 2.4        | 36                  | 15                  | 6.0 ± 0.4                 | 0.00                |
| Rpp2p     | orf19.6403.1                    | Acidic ribosomal protein                       | 3.9 | 10.8        | 2.25       | 55                  | 4                   | 0.5 ± 0.1                 | 0.19                |
| Tpi1p     | orf19.6745                      | Triose phosphate isomerase                     | 5.7 | 26.6        | 2.0        | 35                  | 7                   | 1.8 ± 0.1                 | 0.13                |

**Table S3.** Description of the differentially expressed proteins identified in clinical isolate 6299 by PMF and MALDI-TOF MS

| Protein   | Systematic <sup>a</sup><br>Name | Function                                       | pI  | Mr<br>(kDa) | Z<br>score | Protein<br>coverage | Matched<br>peptides | Fold<br>change<br>6299/5833 | Student's<br>t-test |
|-----------|---------------------------------|------------------------------------------------|-----|-------------|------------|---------------------|---------------------|-----------------------------|---------------------|
| Adh1p     | orf19.3997                      | Alcohol dehydrogenase                          | 8.6 | 46.1        | 2.3        | 42                  | 13                  | 1.7 ± 0.1                   | 0.01                |
| Eno1p     | orf19.395                       | Enolase (2-Phosphoglycerate dehydratase)       | 5.5 | 47.2        | 2.4        | 53                  | 16                  | 2.4 ± 0.7                   | 0.00                |
| Tdh3p     | orf19.6814                      | Glyceraldehyde-3-phosphate dehydrogenase       | 6.6 | 35.8        | 1.8        | 38                  | 10                  | 1.8 ± 0.4                   | 0.09                |
| Gnd1p     | orf19.5024                      | 6-Phosphogluconate dehydrogenase               | 6.1 | 56.9        | 2.4        | 33                  | 18                  | 0.4 ± 0.1                   | 0.05                |
| Gpx1p     | orf19.86                        | Glutathione peroxidase                         | 6.6 | 18.1        | 2.4        | 39                  | 8                   | 3.1 ± 0.6                   | 0.00                |
| Grp2p     | orf19.4309                      | Reductase                                      | 6   | 37.6        | 2.4        | 18                  | 5                   | 11.6 ± 0.8                  | 0.01                |
| Grp2p     | orf19.4309                      | Reductase                                      | 6   | 37.6        | 2.4        | 55                  | 22                  | 13.4 ± 3.9                  | 0.04                |
| lfd1p     | orf19.1048                      | Putative aryl-alcohol dehydrogenase            | 5.6 | 39.1        | 2.2        | 21                  | 9                   | 6.4 ± 1.3                   | 0.01                |
| lfd4p     | orf19.4477                      | Putative aryl-alcohol dehydrogenase            | 6   | 38.3        | 2.3        | 31                  | 8                   | 2.1 ± 1.1                   | 0.06                |
| lfd5p     | orf19.1048                      | Putative aryl-alcohol dehydrogenase            | 5.4 | 39.2        | 2.4        | 33                  | 8                   | 6.9 ± 1.1                   | 0.01                |
| lpf5987p  | orf19.7306                      | Aldo-keto reductase                            | 5.5 | 39.0        | 2.4        | 44                  | 11                  | 3.2 ± 0.3                   | 0.00                |
| Oye32p    | orf19.3131                      | Putative NADPH-dependent flavin oxidoreductase | 5.9 | 47.5        | 1.3        | 16                  | 4                   | 1.7 ± 0.3                   | 0.01                |
| Adh4p     | orf19.271                       | 2,4-dienoyl-coenzyme A reductase               | 7   | 28.1        | 2.4        | 25                  | 7                   | 21.8 ± 7.5                  | 0.00                |
| lpf17186p | orf19.251                       | Heat shock protein 31 of DJ-1/Pfp1 family      | 4.7 | 25.8        | 2.4        | 48                  | 9                   | 5.2 ± 0.6                   | 0.00                |
| lpf17186p | orf19.251                       | Heat shock protein 31 of DJ-1/Pfp1 family      | 4.7 | 25.8        | 2.4        | 36                  | 7                   | 7.7 ± 1.2                   | 0.01                |
| Pdc11p    | orf19.2877                      | Pyruvate decarboxylase                         | 5.4 | 62.4        | 2.3        | 17                  | 7                   | 2.5 ± 1.7                   | 0.16                |
| Rpl10Ep   | orf19.7015                      | Ribosomal protein L10                          | 4.7 | 33.3        | 1.6        | 36                  | 4                   | 1.6 ± 0.2                   | 0.04                |
| Ntf2p     | orf19.4879.2                    | Nuclear transport factor                       | 4.6 | 14.69       | 2.15       | 42                  | 4                   | 0.6 ± 0.2                   | 0.04                |
| Guk1p     | orf19.1115                      | Guanylate kinase                               | 5.6 | 21.3        | 1.5        | 17                  | 4                   | 0.5 ± 0.0                   | 0.00                |

**Table S4.** Description of the differentially expressed proteins identified in clinical isolate 5674 and mutant strain SZY91 by PMF and MALDI-TOF MS

| Protein   | Systematic Name | Function                                 | pI  | Mr (kDa) | Z score | Protein coverage | Matched peptides | Fold changes |              |                | Student's t-test |            |              |
|-----------|-----------------|------------------------------------------|-----|----------|---------|------------------|------------------|--------------|--------------|----------------|------------------|------------|--------------|
|           |                 |                                          |     |          |         |                  |                  | (5674/5457)  | (SZY31/5457) | (SZY91/SC5314) | (5674/5457)      | SZY31/5457 | SZY91/SC5314 |
| Eno1p     | orf19.395       | Enolase (2-Phosphoglycerate dehydratase) | 5.5 | 47.2     | 2.3     | 40               | 15               | 2.2 ± 0.4    | 1.2 ± 0.3    | 0.7 ± 0.5      | 0.00             | 0.17       | 0.16         |
| Tdh3p     | orf19.6814      | Glyceraldehyde-3-phosphate dehydrogenase | 6.6 | 35.8     | 2.1     | 46               | 10               | 2 ± 0.5      | 0.9 ± 0.2    | 0.9 ± 0.3      | 0.03             | 0.43       | 0.26         |
| Gpx1p     | orf19.86        | Glutathione peroxidase                   | 6.6 | 18.1     | 2.4     | 26               | 6                | 8.5 ± 1.5    | 1.2 ± 0.2    | 103 ± 102.7    | 0.01             | 0.11       | 0.03         |
| lpf4065p  | orf19.1862      | Unknown function                         | 5.2 | 13.1     | 2.2     | 50               | 4                | 2.2 ± 0.2    | 1.1 ± 0.1    | 1.5 ± 0.7      | 0.01             | 0.14       | 0.15         |
| lpf15297p | orf19.3053      | Unknown function                         | 4.3 | 20.3     | 2.3     | 59               | 8                | 1.6 ± 0.1    | 1.0 ± 0.1    | 4.0 ± 2.6      | 0.01             | 0.44       | 0.12         |
| Pdc11p    | orf19.2877      | Pyruvate decarboxylase                   | 5.4 | 62.4     | 2.4     | 35               | 11               | 2.3 ± 0.6    | 1.5 ± 0.2    | 1.4 ± 1.0      | 0.00             | 0.00       | 0.1          |
| Ssb1p     | orf19.6367      | Heat shock protein 70                    | 5.3 | 66.4     | 2.4     | 40               | 24               | 1.6 ± 0.3    | 2.5 ± 1.7    | 1.1 ± 0.6      | 0.06             | 0.14       | 0.37         |
| Ino1p     | orf19.7585      | Myoinositol-1-phosphate synthase         | 5.3 | 57.8     | 2.4     | 25               | 11               | 2.6 ± 0.9    | 1.0 ± 0.2    | No spot        | 0.02             | 0.39       | N/A          |
| Ssb1p     | orf19.6367      | Heat shock protein 70                    | 5.3 | 66.4     | 1.6     | 14               | 8                | 0.5 ± 0      | 0.7 ± 0.3    | No spot        | 0.00             | 0.14       | N/A          |
| Snz1p     | orf19.2947      | Stationary phase protein                 | 5.8 | 31.8     | 1.7     | 15               | 5                | 0.5 ± 0      | 0.9 ± 0.1    | 2.3 ± 0.4      | 0.00             | 0.11       | 0.11         |
| Adh1p     | orf19.3997      | Alcohol dehydrogenase                    | 8.6 | 46.1     | 2.4     | 53               | 20               | 1.5 ± 0      | 1.0 ± 0.3    | 1.5 ± 0.6      | 0.00             | 0.32       | 0.10         |
| Ado1p     | orf19.5591      | Adenosine kinase                         | 5   | 38.2     | 2.3     | 35               | 10               | 0.5 ± 0.1    | 1.0 ± 0.1    | 0.9 ± 0.1      | 0.01             | 0.46       | 0.13         |
| Apt1p     | orf19.1448      | Adenine phosphoribosyltransferase        | 5.2 | 20.9     | 2.3     | 52               | 7                | 0.5 ± 0.1    | 1.1 ± 0.2    | 1.2 ± 0.2      | 0.02             | 0.31       | 0.13         |
| Tif1p     | orf19.3324      | Translation initiation factor (eIF4B)    | 5.2 | 44.6     | 2.4     | 39               | 14               | 2.3 ± 0.2    | 1.2 ± 0.6    | 1.0 ± 0.2      | 0.01             | 0.29       | 0.37         |
| Ura5p     | orf19.2555      | Orotate phosphoribosyltransferase        | 5.9 | 23.5     | 1.7     | 22               | 4                | 0.6 ± 0.0    | 0.8 ± 0.2    | 1.3 ± 0.2      | 0.00             | 0.13       | 0.05         |
| Imh3p     | orf19.18        | Inosine monophosphate dehydrogenase      | 6.7 | 39.8     | 2.4     | 22               | 6                | 0.5 ± 0      | 1.1 ± 0.1    | 1.9 ± 0.7      | 0.00             | 0.16       | 0.06         |
| Guk1p     | orf19.1115      | Guanylate kinase                         | 5.6 | 21.3     | 2.3     | 23               | 5                | 0.6 ± 0.1    | 1.1 ± 0.1    | 1.9 ± 0.4      | 0.02             | 0.20       | 0.02         |
| Rpl10Ep   | orf19.7015      | Ribosomal protein L10                    | 4.7 | 33.3     | 2.3     | 31               | 9                | 0.6 ± 0.2    | 1.2 ± 0.1    | 1.3 ± 0.6      | 0.02             | 0.09       | 0.28         |
| Gpm1p     | orf19.903       | Phosphoglycerate mutase                  | 5.8 | 27.4     | 2.24    | 35               | 7                | 2.5 ± 0.8    | 1.2 ± 0.3    | 3.0 ± 2.6      | 0.0              | 0.15       | 0.08         |

N/A-not applicable

**Table S5.** Description of the differentially expressed proteins identified in clinical isolate Gu5 by PMF and MALDI-TOF MS

| Protein   | Systematic <sup>a</sup><br>Name | Function                                 | pI  | Mr<br>(kDa) | Z<br>score | Protein<br>coverage | Matched<br>peptides | Fold<br>change<br>Gu5/Gu2 | Student's<br>t-test |
|-----------|---------------------------------|------------------------------------------|-----|-------------|------------|---------------------|---------------------|---------------------------|---------------------|
| Eno1p     | orf19.395                       | Enolase (2-Phosphoglycerate dehydratase) | 5.5 | 47.2        | 2.4        | 49                  | 18                  | 2.0 ± 0.3                 | 0.05                |
| Tdh3p     | orf19.6814                      | Glyceraldehyde-3-phosphate dehydrogenase | 6.6 | 35.8        | 2.4        | 29                  | 8                   | 1.7 ± 0.3                 | 0.00                |
| Gpx1p     | orf19.86                        | Glutathione peroxidase                   | 6.6 | 18.1        | 2.4        | 37                  | 7                   | 4.2 ± 1.3                 | 0.00                |
| lpf4065p  | orf19.1862                      | Unknown function                         | 5.2 | 13.1        | 2.3        | 56                  | 6                   | 2.0 ± 0.3                 | 0.01                |
| lpf15297p | orf19.3053                      | Unknown function                         | 4.3 | 20.3        | 1.8        | 25                  | 5                   | 1.8 ± 0.2                 | 0.00                |
| Pdc11p    | orf19.2877                      | Pyruvate decarboxylase                   | 5.4 | 62.4        | 2.4        | 31                  | 14                  | 2.2 ± 0.8                 | 0.00                |
| Ssb1p     | orf19.6367                      | Heat shock protein 70                    | 5.3 | 66.4        | 2.4        | 29                  | 15                  | 1.7 ± 0.4                 | 0.00                |
| Adh1p     | orf19.3997                      | Alcohol dehydrogenase                    | 8.6 | 46.1        | 2.3        | 20                  | 7                   | 2.0 ± 0.4                 | 0.01                |
| Atp2p     | orf19.5653                      | F1F0 ATPase complex, beta subunit        | 4.9 | 55.7        | 2.4        | 51                  | 18                  | 1.8 ± 0.3                 | 0.05                |
| Ino1p     | orf19.7585                      | Myoinositol-1-phosphate synthase         | 5.3 | 57.8        | 2.3        | 28                  | 9                   | 2.7 ± 0.5                 | 0.01                |
| Ssb1p     | orf19.6367                      | Heat shock protein 70                    | 5.3 | 66.4        | 2.4        | 56                  | 28                  | 0.5 ± 0.3                 | 0.08                |
| Snz1p     | orf19.2947                      | Stationary phase protein                 | 5.8 | 31.8        | 2.3        | 24                  | 7                   | 0.5 ± 0.1                 | 0.00                |
| Apt1p     | orf19.1448                      | Adenine phosphoribosyltransferase        | 5.2 | 20.9        | 2.1        | 49                  | 6                   | 0.2 ± 0.3                 | 0.02                |
| Ssa1p     | orf19.4980                      | Heat shock protein 70                    | 4.9 | 70.1        | 2.3        | 17                  | 11                  | 3.7 ± 3.1                 | 0.05                |
| ldh2p     | orf19.5791                      | Isocitrate dehydrogenase                 | 6.4 | 39.3        | 1.7        | 21                  | 6                   | 0.5 ± 0.0                 | 0.01                |
| Gnd1p     | orf19.5024                      | 6-Phosphogluconate dehydrogenase         | 6.1 | 56.9        | 2.3        | 18                  | 7                   | 0.4 ± 0.1                 | 0.03                |
| Ilv5p     | orf19.88                        | Keto-acid reducto-isomerase              | 6.2 | 44.8        | 2.3        | 24                  | 11                  | 1.5 ± 0.2                 | 0.01                |
| Rps5p     | orf19.4336                      | Ribosomal protein S5                     | 9   | 25.3        | 2.3        | 20                  | 7                   | 2.2 ± 0.9                 | 0.06                |
| Rpl10Ep   | orf19.7015                      | Ribosomal protein L10                    | 4.7 | 33.3        | 1.6        | 18                  | 5                   | 1.8 ± 0.5                 | 0.05                |
| Sap8p     | orf19.242                       | Aspartic protease                        | 5.9 | 43.0        | 1.7        | 16                  | 4                   | 1.7 ± 0.4                 | 0.04                |

**Table S6.** Description of the differentially expressed proteins identified in clinical isolate C56 by PMF and MALDI-TOF MS

| Protein   | Systematic <sup>a</sup><br>Name | Function                                                               | pI  | Mr<br>(kDa) | Z<br>score | Protein<br>coverage | Matched<br>peptides | Fold<br>change<br>C56/C43 | Student's<br>t-test |
|-----------|---------------------------------|------------------------------------------------------------------------|-----|-------------|------------|---------------------|---------------------|---------------------------|---------------------|
| Eno1p     | orf19.395                       | Enolase (2-Phosphoglycerate dehydratase)                               | 5.5 | 47.2        | 2.0        | 21                  | 7                   | 1.6 ± 0.6                 | 0.11                |
| Tdh3p     | orf19.6814                      | Glyceraldehyde-3-phosphate dehydrogenase                               | 6.6 | 35.8        | 2.3        | 18                  | 6                   | 2.1 ± 1.1                 | 0.08                |
| Gpx1p     | orf19.86                        | Glutathione peroxidase                                                 | 6.6 | 18.1        | 2.0        | 23                  | 5                   | 12 ± 8                    | 0.05                |
| lpf4065p  | orf19.1862                      | Unknown function                                                       | 5.2 | 13.1        | 1.7        | 47                  | 4                   | 3.9 ± 1.5                 | 0.01                |
| lpf15297p | orf19.3053                      | Unknown function                                                       | 4.3 | 20.3        | 1.9        | 39                  | 5                   | 6.1 ± 2.5                 | 0.01                |
| Pdc11p    | orf19.2877                      | Pyruvate decarboxylase                                                 | 5.4 | 62.4        | 2.4        | 34                  | 14                  | 1.6 ± 0.2                 | 0.04                |
| Ssb1p     | orf19.6367                      | Heat shock protein 70                                                  | 5.3 | 66.4        | 2.3        | 39                  | 14                  | 2.2 ± 0.1                 | 0.03                |
| Adh1p     | orf19.3997                      | Alcohol dehydrogenase                                                  | 8.6 | 46.1        | 2.4        | 50                  | 16                  | 510 ± 456                 | 0.01                |
| Atp2p     | orf19.5653                      | F1F0 ATPase complex, beta subunit                                      | 4.9 | 55.7        | 2.4        | 52                  | 16                  | 1.8 ± 0.5                 | 0.00                |
| Ssb1p     | orf19.6367                      | Heat shock protein 70                                                  | 5.3 | 66.4        | 1.7        | 19                  | 7                   | 0.5 ± 0                   | 0.03                |
| Snz1p     | orf19.2947                      | Stationary phase protein                                               | 5.8 | 31.8        | 2.4        | 24                  | 7                   | 0.4 ± 0.2                 | 0.02                |
| Ado1p     | orf19.5591                      | Adenosine kinase                                                       | 5   | 38.2        | 2.4        | 43                  | 11                  | 0.5 ± 0.0                 | 0.04                |
| Car2p     | orf19.5641                      | Ornithine aminotransferase                                             | 5.9 | 47.3        | 2.3        | 41                  | 13                  | 9.2 ± 3.6                 | 0.00                |
| Aco1p     | orf19.6385                      | Aconitate hydratase                                                    | 6   | 84.2        | 2.4        | 36                  | 26                  | 0.5 ± 0.2                 | 0.02                |
| Tsa1p     | orf19.7417                      | Similar to <i>S.cerevisiae</i> thiol-specific antioxidant-like protein | 5   | 21.8        | 2.3        | 37                  | 7                   | 2.4 ± 1.1                 | 0.07                |
| Tal1p     | orf19.4371                      | Transaldolase                                                          | 4.9 | 35.7        | 2.4        | 23                  | 8                   | 0.6 ± 0.1                 | 0.04                |
| Asr2p     | orf19.7284                      | Unknown function                                                       | 5.4 | 27.8        | 2.2        | 29                  | 7                   | 24.3 ± 16.9               | 0.01                |
